# Supplementary material for: Phase separation affects the rheological properties of starch dough fortified with fish actomyosin
Source: Royal Society of Chemistry journal article supplement (doi:10.1039/d0ra10236a), 2021-01-01
Supplement: d0ra10236a1.pdf [file d0ra10236a1.pdf]

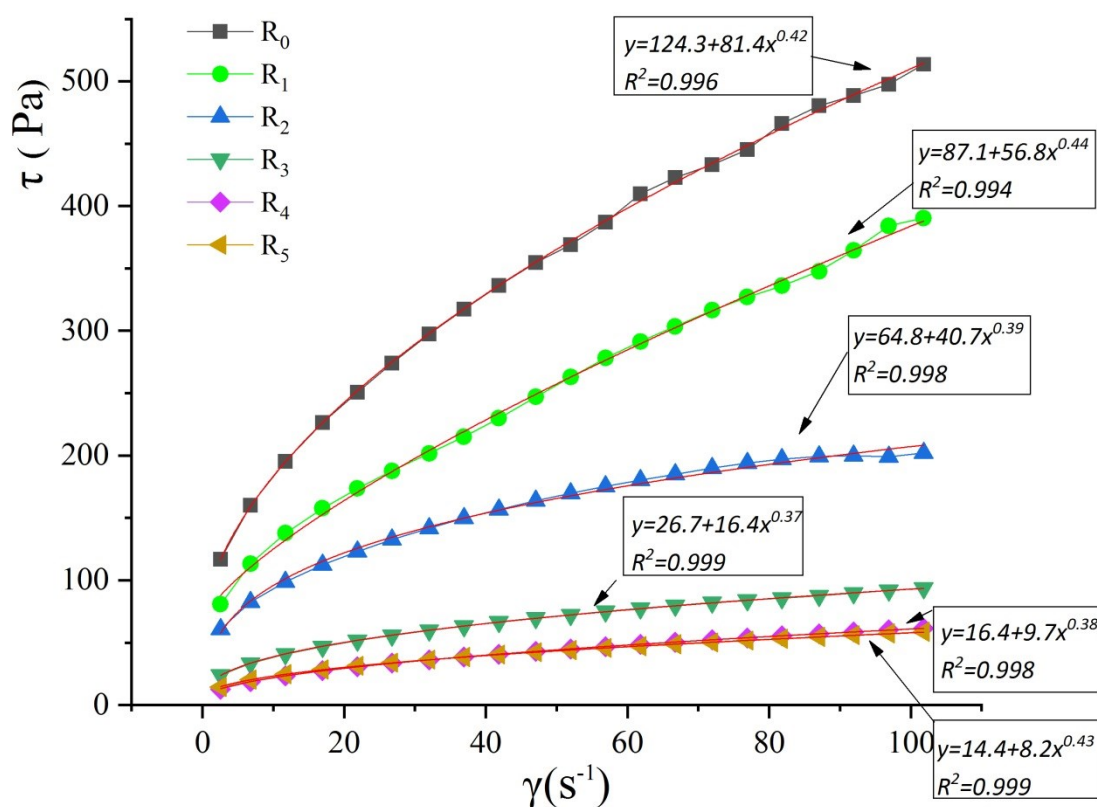

**Supplementary Fig. 1. Fitted plots of actomyosin-mung bean starch blend doughs**

(Note: R<sub>1</sub>-R<sub>5</sub>: dough blends prepared from actomyosin and mung bean starch with mixing ratio from 9:1 to 5:5. R<sub>0</sub>: dough prepared from mung bean starch without actomyosin addition. Fitting software: Origin 2018. Corresponding fitting function of Herchel-Bulkey model: Allometric 2)

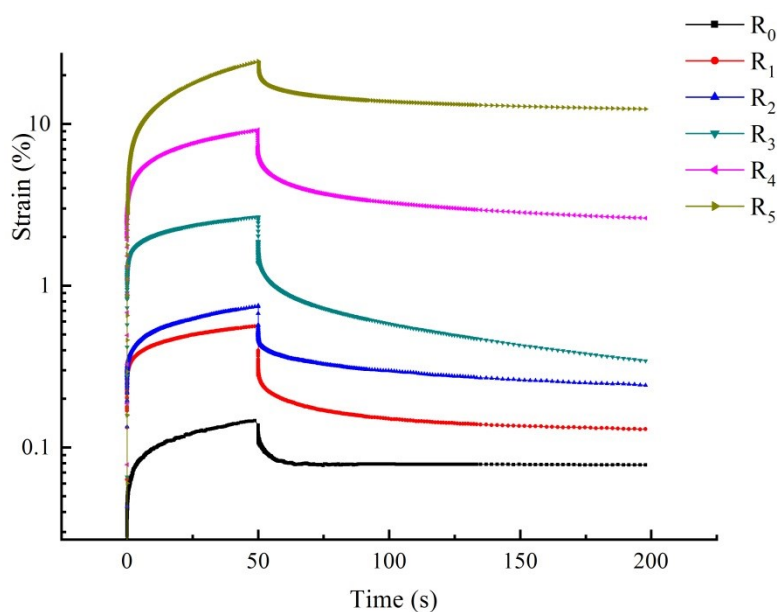

**Supplementary Fig.2. Creep-recovery curves of the six different model dough blends**

(Note: R<sub>1</sub>-R<sub>5</sub>: dough blends prepared from actomyosin and mung bean starch with mixing ratio from 9:1 to 5:5. R<sub>0</sub>: dough prepared from mung bean starch without actomyosin addition)
